# Supplementary material
Source: publisher figshare collection journal article supplement (https://sage.figshare.com/ndownloader/files/13993322)
Supplement: Supplementary file 1 [file 13993322]

**Table 14.** Histomorphologic Observations in Hematopoietic/Lymphoid Organs of Tg.rasH2 and CD-1 Mice (Study 2)

| **Group** | **1** | | | | **2** | | | | | **3** | | | | | | | **4** | | | | | | | | | **5** | | | | | | | | **6** | | | | | | **7** | | | | | | **8** | | | | | | | **9** | | | | | | |
| --- | --- | --- | --- | --- | --- | --- | --- | --- | --- | --- | --- | --- | --- | --- | --- | --- | --- | --- | --- | --- | --- | --- | --- | --- | --- | --- | --- | --- | --- | --- | --- | --- | --- | --- | --- | --- | --- | --- | --- | --- | --- | --- | --- | --- | --- | --- | --- | --- | --- | --- | --- | --- | --- | --- | --- | --- | --- | --- | --- |
| **Treatment** | **Saline Control** | | | | | | | | | **ISIS 487660** | | | | | | | | | | | | | | | | **ISIS 420476** | | | | | | | | **ISIS 104838** | | | | | | | | | | | | **ISIS 421856** | | | | | | | | | | | | | |
| **Strain** | **Tg.rasH2** | | | | | | **CD-1** | | | | **Tg.rasH2** | | | | | | | | | | **CD-1** | | | | | | | | **Tg.rasH2** | | | | **Tg.rasH2** | | | | | | | | | **CD-1** | | | | | | **Tg.rasH2** | | | | | | | | **CD-1** | | | |
| **Sex** | **M** | | **F** | | **M** | | | **F** | | **M** | | | | **F** | | | | **M** | | | | | **F** | | | **M** | | | | **F** | | | | **M** | | | **F** | | | **M** | | | **F** | | | **M** | | | | **F** | | | **M** | | | | **F** | | |
| **No. Examined** | **5** | | **6** | | **3** | | | **3** | | **6** | | | | **6** | | | | **3** | | | | | **3** | | | **6** | | | | **6** | | | | **6** | | | **6** | | | **3** | | | **3** | | | **6** | | | | **6** | | | **3** | | | | **3** | | |
| **Spleen** |  | |  | |  | | |  | | | |  | | |  | | | |  | | | | |  | | |  | | | |  | | | |  | | |  | | |  | | |  | | |  | | | |  | | |  | | | |  | | |
| Cellularity, increased, hematopoietic | 0 | | 0 | | 0 | | | 0 | | | | 6 | | | 5 | | | | 2 | | | | | 3 | | | 6 | | | | 5 | | | | 5 | | | 6 | | | 3 | | | 2 | | | 6 | | | | 6 | | | 3 | | | | 3 | | |
| -minimal | 0 | | 0 | | 0 | | | 0 | | | | 6 | | | 5 | | | | 2 | | | | | 3 | | | 6 | | | | 3 | | | | 5 | | | 5 | | | 2 | | | 2 | | | 0 | | | | 0 | | | 0 | | | | 1 | | |
| -mild | 0 | | 0 | | 0 | | | 0 | | | | 0 | | | 0 | | | | 0 | | | | | 0 | | | 0 | | | | 2 | | | | 0 | | | 1 | | | 1 | | | 0 | | | 6 | | | | 1 | | | 3 | | | | 2 | | |
| -moderate | 0 | | 0 | | 0 | | | 0 | | | | 0 | | | 0 | | | | 0 | | | | | 0 | | | 0 | | | | 0 | | | | 0 | | | 0 | | | 0 | | | 0 | | | 0 | | | | 5 | | | 0 | | | | 0 | | |
| Hyperplasia, lymphoid, generalized | 0 | | 0 | | 0 | | | 0 | | | | 0 | | | 0 | | | | 0 | | | | | 0 | | | 0 | | | | 0 | | | | 0 | | | 0 | | | 0 | | | 2 | | | 6 | | | | 5 | | | 3 | | | | 3 | | |
| -minimal | 0 | | 0 | | 0 | | | 0 | | | | 0 | | | 0 | | | | 0 | | | | | 0 | | | 0 | | | | 0 | | | | 0 | | | 0 | | | 0 | | | 2 | | | 2 | | | | 4 | | | 3 | | | | 1 | | |
| -mild | 0 | | 0 | | 0 | | | 0 | | | | 0 | | | 0 | | | | 0 | | | | | 0 | | | 0 | | | | 0 | | | | 0 | | | 0 | | | 0 | | | 0 | | | 4 | | | | 1 | | | 0 | | | | 2 | | |
| Macrophages, vacuolated/granular |  | |  | |  | | |  | | | |  | | |  | | | |  | | | | |  | | |  | | | |  | | | |  | | |  | | |  | | |  | | |  | | | |  | | |  | | | |  | | |
| -minimal | 0 | | 0 | | 0 | | | 0 | | | | 6 | | | 6 | | | | 3 | | | | | 3 | | | 6 | | | | 6 | | | | 6 | | | 5 | | | 3 | | | 3 | | | 6 | | | | 6 | | | 3 | | | | 3 | | |
| **Lymph node, mesenteric** |  | |  | |  | | |  | | | |  | | |  | | | |  | | | | |  | | |  | | | |  | | | |  | | |  | | |  | | |  | | |  | | | |  | | |  | | | |  | | |
| Hyperplasia, lymphoid, generalized | 0 | | 0 | | 0 | | | 0 | | | | 0 | | | 0 | | | | 0 | | | | | 0 | | | 0 | | | | 1 | | | | 0 | | | 1 | | | 0 | | | 0 | | | 2 | | | | 5 | | | 0 | | | | 3 | | |
| -minimal | 0 | | 0 | | 0 | | | 0 | | | | 0 | | | 0 | | | | 0 | | | | | 0 | | | 0 | | | | 1 | | | | 0 | | | 1 | | | 0 | | | 0 | | | 1 | | | | 1 | | | 0 | | | | 1 | | |
| -mild | 0 | | 0 | | 0 | | | 0 | | | | 0 | | | 0 | | | | 0 | | | | | 0 | | | 0 | | | | 0 | | | | 0 | | | 0 | | | 0 | | | 0 | | | 1 | | | | 4 | | | 0 | | | | 2 | | |
| Macrophages, vacuolated/granular | 0 | | 0 | | 0 | | | 0 | | | | 6 | | | 6 | | | | 3 | | | | | 3 | | | 6 | | | | 6 | | | | 6 | | | 6 | | | 3 | | | 3 | | | 6 | | | | 6 | | | 3 | | | | 3 | | |
| -minimal | 0 | | 0 | | 0 | | | 0 | | | | 1 | | | 0 | | | | 0 | | | | | 0 | | | 0 | | | | 1 | | | | 0 | | | 1 | | | 0 | | | 0 | | | 0 | | | | 0 | | | 0 | | | | 1 | | |
| -mild | 0 | | 0 | | 0 | | | 0 | | | | 2 | | | 3 | | | | 1 | | | | | 1 | | | 6 | | | | 5 | | | | 6 | | | 4 | | | 3 | | | 2 | | | 4 | | | | 1 | | | 1 | | | | 1 | | |
| -moderate | 0 | | 0 | | 0 | | | 0 | | | | 3 | | | 3 | | | | 2 | | | | | 2 | | | 0 | | | | 0 | | | | 0 | | | 1 | | | 0 | | | 1 | | | 2 | | | | 4 | | | 2 | | | | 1 | | |
| -severe | 0 | | 0 | | 0 | | | 0 | | | | 0 | | | 0 | | | | 0 | | | | | 0 | | | 0 | | | | 0 | | | | 0 | | | 0 | | | 0 | | | 0 | | | 0 | | | | 1 | | | 0 | | | | 0 | | |
| Hematopoiesis, extramedullary |  | |  | |  | | |  | | | |  | | |  | | | |  | | | | |  | | |  | | | |  | | | |  | | |  | | |  | | |  | | |  | | | |  | | |  | | | |  | | |
| -minimal | 0 | | 0 | | 0 | | | 0 | | | | 0 | | | 1 | | | | 1 | | | | | 0 | | | 0 | | | | 0 | | | | 0 | | | 1 | | | 0 | | | 0 | | | 0 | | | | 2 | | | 1 | | | | 0 | | |
| **Bone marrow, femur** |  | |  | |  | | |  | | | |  | | |  | | | |  | | | | |  | | |  | | | |  | | | |  | | |  | | |  | | |  | | |  | | | |  | | |  | | | |  | | |
| Myeloid/erythroid ratio, increased | 0 | | 0 | | 0 | | | 0 | | | | 0 | | | 0 | | | | 0 | | | | | 0 | | | 0 | | | | 0 | | | | 0 | | | 0 | | | 1 | | | 1 | | | 4 | | | | 3 | | | 1 | | | | 3 | | |
| -minimal | 0 | | 0 | | 0 | | | 0 | | | | 0 | | | 0 | | | | 0 | | | | | 0 | | | 0 | | | | 0 | | | | 0 | | | 0 | | | 1 | | | 1 | | | 4 | | | | 3 | | | 1 | | | | 2 | | |
| -mild | 0 | | 0 | | 0 | | | 0 | | | | 0 | | | 0 | | | | 0 | | | | | 0 | | | 0 | | | | 0 | | | | 0 | | | 0 | | | 0 | | | 0 | | | 0 | | | | 0 | | | 0 | | | | 1 | | |
| Macrophages, vacuolated/granular |  | |  | |  | | |  | | | |  | | |  | | | |  | | | | |  | | |  | | | |  | | | |  | | |  | | |  | | |  | | |  | | | |  | | |  | | | |  | | |
| -minimal | 0 | | 0 | | 0 | | | 0 | | | | 5 | | | 6 | | | | 3 | | | | | 2 | | | 6 | | | | 6 | | | | 6 | | | 6 | | | 3 | | | 3 | | | 6 | | | | 2 | | | 1 | | | | 2 | | |
|  | | |  | |  | |  | | |  | | | |  | | |  | | | |  | | | | |  | | |  | | | |  | | | |  | | |  | | |  | | |  | | | |  | | |  | | |  | | | |  | | |
| M-Male; F-Female | | | | | | | | | | | | | | | | | | | | | | |  | | | | | | | | | | | | | | | | | | | | | | | | | | | | | | | | | | | | | | | |
